# Supplementary material for: Could spontaneous interpersonal synchronization enhance athletes’ performance? A case report on the Japanese 100-m record race
Source: Research Square preprint supplement (doi:10.21203/rs.3.rs-4623922/v1), 2024-07-18
Supplement: Supplementary file 1 [file 846b61bc721f58326cd1a887.docx]

**Supplementary material**

Data S1

For an indication of the analyzed video of 1) the final race starting at 9 min 49 s, and 2) the preliminary races starting at 5 min 43 s (Tada) and 9 min 17 s (Yamagata) - see the following link:

1) <https://www.youtube.com/watch?v=4bsQALMc_fM&t=589s>

2) <https://www.youtube.com/watch?v=24g3ZMtE-b0&t=265s>

Data S2

The wind speed information for each race can be accessed at the following link:

<http://www.hal.ne.jp/trk/result/2021_gusesprint_allresult.pdf>

**Figure S1.**  Time series of relative phases in Tada Final - Yamagata Preliminary (same finish time), in Tada Preliminary - Yamagata Final and in intrapersonal (Final - Preliminary). Even if the finish times happened to be the same, they were not the same phase relationship. The intrapersonal could confirm whether the phase change was simply velocity dependent. In other words, if the change in relative phase between the preliminary and final rounds depends only on the intrapersonal velocity change, the intrapersonal relative phase should increase linearly. However, the intrapersonal changes of the two individuals were accompanied by variations, suggesting that the changes were not due to a simple velocity dependence.
